# Supplementary material for: Problematic Internet Use and Video Gaming : Are They Emerging Risk Factors for Elevated Blood Pressure?
Source: Research Square preprint supplement (doi:10.21203/rs.3.rs-8182015/v1), 2025-12-01
Supplement: Supplementary file 1 [file 6701d47961dd97d755205367.docx]

**Supplementary Table 1: Comparison of YIAS-SF and IGDS9-SF With Blood Pressure Categories**

|  | **Total (n=107)** | **Normotensive**  **(n=39)** | **Prehypertensive**  **(n=19)** | **Hypertensive**  **(n=49)** | **p** |
| --- | --- | --- | --- | --- | --- |
| **YIAS-SF Scores** |  |  |  |  | 0,33c |
| Mean±SD | 27,8±8,2 | 26,4±9,2 | 29,5±7,5 | 28,1±7,4 |  |
| Median (Min-Max) | 27 (12-50) | 25 (12-50) | 29 (16-46) | 28 (17-46) |  |
| **IGDS9-SF** |  |  |  |  | 0,64b |
| Mean±SD | 16,8±6,8 | 16,7±7 | 17,5±6,3 | 16,4±6,9 |  |
| Median (Min-Max) | 16 (9-40) | 16 (9-40) | 17,5 (9-30) | 15 (9-33) |  |

bKruskal-Wallis H

cOne-Way ANOVA

YIAS-SF : Young Internet Addiction Short Form

IGDS9-SF:Internet Gaming Disorder Scale Short Form

Min:minimum Max: Maximum

SD: standart deviation
