# Supplementary material for: Problematic Internet Use and Video Gaming : Are They Emerging Risk Factors for Elevated Blood Pressure?
Source: Research Square preprint supplement (doi:10.21203/rs.3.rs-8182015/v1), 2025-12-01
Supplement: Supplementary file 2 [file 9186905ffa277c8970457911.docx]

**Supplementary Table 3: Comparison of ABPM Parameters With YIAS-SF and IGDS9-SF Scores**

|  | **YIA-SF** | | **IGDS9-SF** | |
| --- | --- | --- | --- | --- |
| **ABPM Parameters** | **r / rs** | **p değeri** | **rs** | **p değeri**a |
| Mean Systolic BP Load | 0,058 | 0,55 b | -0,085 | 0,38 |
| Daytime Systolic BP load | 0,117 | 0,23a | 0,028 | 0,77 |
| Nighttime Systolic BP load | 0,140 | 0,15a | -0,002 | 0,98 |
| Mean Diastolic BP Load | 0,009 | 0,93a | -0,073 | 0,46 |
| Daytime Diastolic BP Load | 0,020 | 0,84a | -0,079 | 0,42 |
| Nighttime Diastolic BP Load | 0,068 | 0,49a | -0,024 | 0,81 |
| Maximum daytime systolic BP | 0,223 | **0,021**a | 0,132 | 0,18 |
| Maximum daytime diastolic BP | 0,048 | 0,63b | -0,026 | 0,49 |
| Maximum nighttime systolic BP | 0,140 | 0,15b | 0,090 | 0,36 |
| Maximum nighttime diastolic BP | 0,089 | 0,36b | 0,039 | 0,69 |
| Systolic dipping | -0,084 | 0,39a | -0,094 | 0,34 |
| Diastolic dipping | -0,062 | 0,52a | -0,044 | 0,66 |

ABPM: Ambulatory Blood Pressure Monitoring

YIAS-SF: Young Internet Addiction Short Form

IGDS9-SF**:** Internet Gaming Disorder Scale Short Form

BP: Blood Pressure

a:Spearman

b:Pearson
