# Supplementary material for: Problematic Internet Use and Video Gaming : Are They Emerging Risk Factors for Elevated Blood Pressure?
Source: Research Square preprint supplement (doi:10.21203/rs.3.rs-8182015/v1), 2025-12-01
Supplement: Supplementary file 3 [file 97302057c37556fe2121d5b8.docx]

**Supplementary Table 2: Comparison of Mean Office Blood Pressure And Mean ABPM Results With**

**YIAS-SF and IGDS9-SF Scores**

|  | **YIAS-SF** | | **IGDS9-SF** | |
| --- | --- | --- | --- | --- |
| **BP Categories** | **r / rs** | **p** | **rs** | **p** a |
| **Office systolic BP** | -0,026 | 0,79a | -0,124 | 0,20 |
| **Office diastolic BP** | 0,007 | 0,94a | -0,062 | 0,53 |
| **Heart Rate** | 0,035 | 0,72a | 0,102 | 0,30 |
| **Mean systolic BP** | 0,168 | 0,084a | 0,025 | 0,80 |
| **Mean diastolic BP** | 0,152 | 0,12a | -0,011 | 0,91 |
| **Daytime systolic BP** | 0,191 | **0,049**a | 0,027 | 0,78 |
| **Daytime diastolic BP** | 0,118 | 0,23a | -0,024 | 0,81 |
| **Nighttime systolic BP** | 0,110 | 0,26b | 0,070 | 0,48 |
| **Nighttime diastolic BP** | 0,136 | 0,16a | 0,015 | 0,88 |

ABPM:Ambulatory Blood Pressure Monitoring

BP: Blood Pressure

YIAS-SF: Young Internet Addiction Short Form

IGDS9-SF: Internet Gaming Disorder Scale Short Form

a: Spearman
